# Supplementary material
Source: PubMed Central journal article supplement (PMC2849817)

Soler et al., Supplemental Figure S1

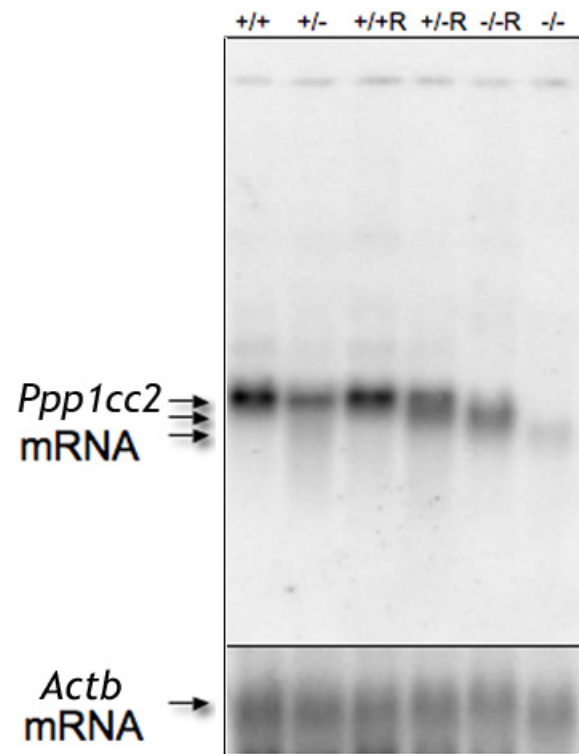

Soler et al., Supplemental Figure S2

Supplemental Figure 2

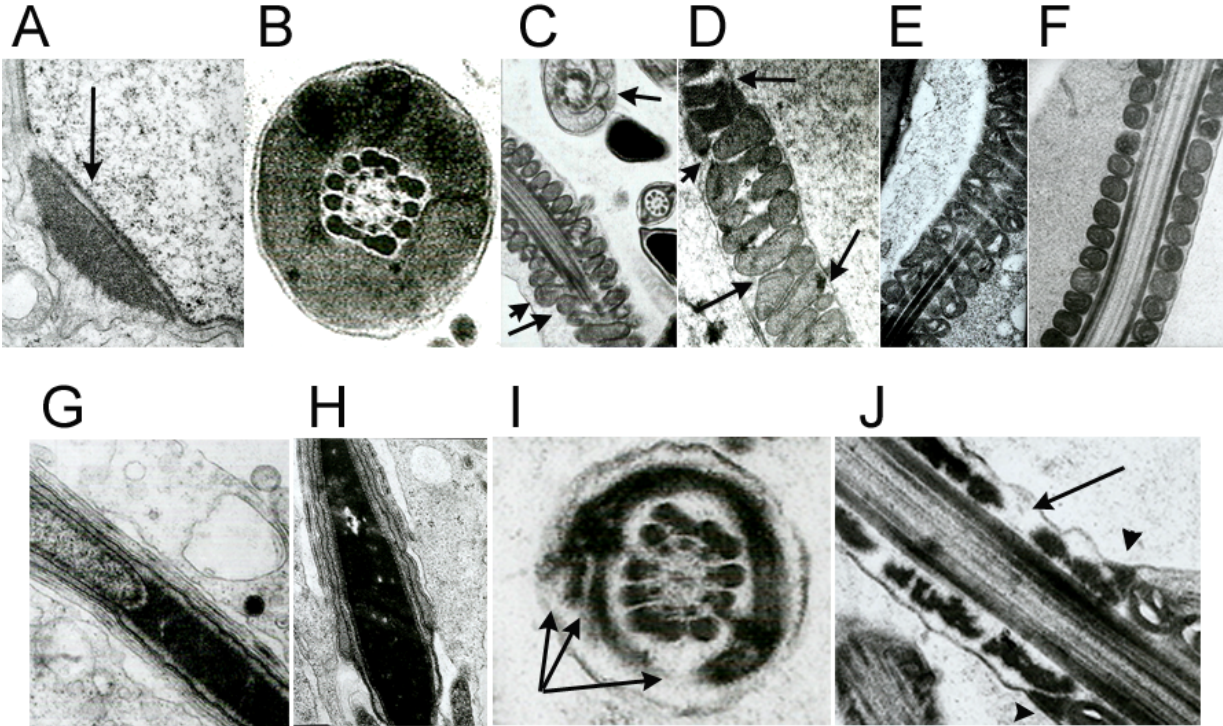

Supplement: supp_109.076398_biolreprod.109.076398-1.pdf [file supp_109.076398_biolreprod.109.076398-1.pdf]
